# Supplementary material
Source: MDPI journal article supplement (https://www.mdpi.com/2311-5637/3/2/18)
Supplement: s1 [file s1]

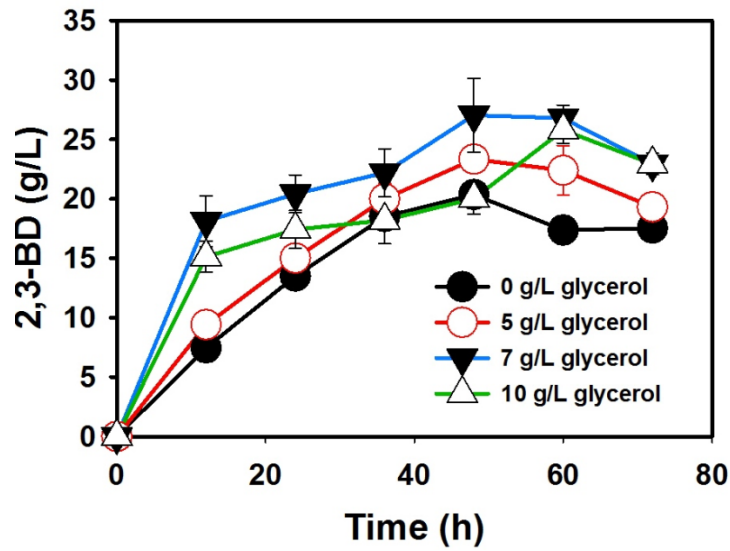

**Figure S1.** One-factor at a time experiments showing effects of crude glycerol on 2,3-BD production by *P. polymyxa*. Inoculum size, temperature, yeast extract, tryptone, ammonium sulfate and ammonium acetate were kept at 8%, 37 °C, 7 g/L, 7 g/L, 3 g/L and 5 g/L, respectively. Error bars show standard deviations of means ( $n = 3$ ).

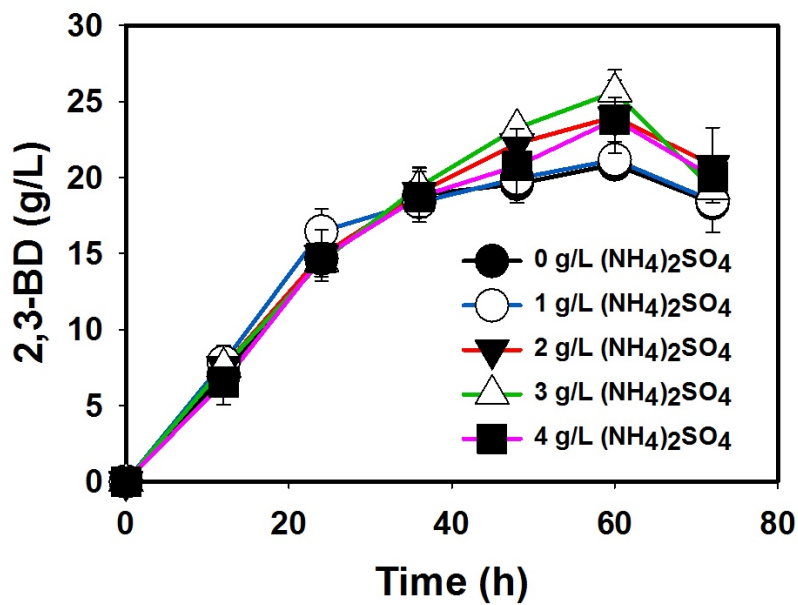

**Figure S2.** One-factor at a time experiments showing effects of ammonium sulfate on 2,3-BD production by *P. polymyxa*. Inoculum size, temperature, glycerol, yeast extract, tryptone and ammonium acetate were kept at 8%, 37 °C, 10 g/L, 7g/L, 7 g/L and 5 g/L, respectively. Error bars show standard deviations of means ( $n = 3$ ).

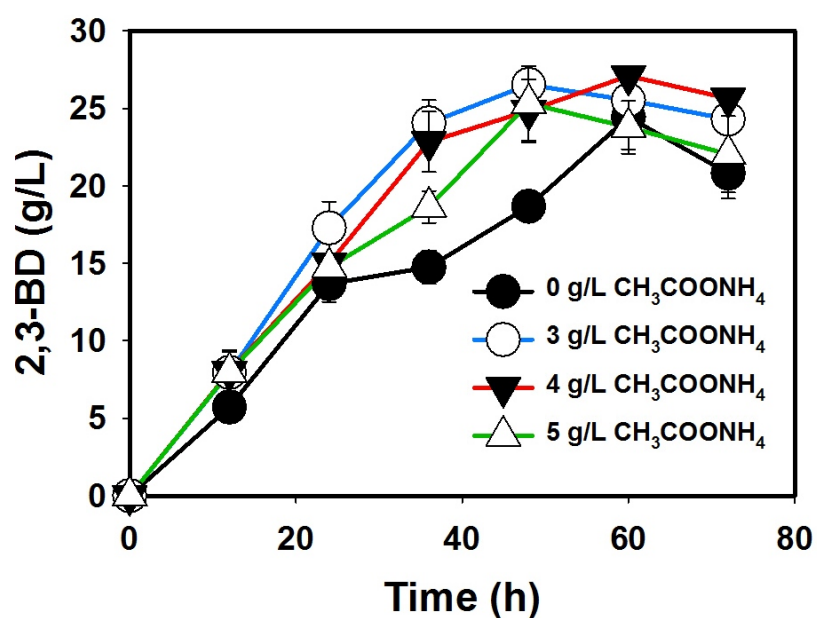

**Figure S3.** One-factor at a time experiments showing effects of ammonium acetate on 2,3-BD production by *P. polymyxa*. Inoculum size, temperature, glycerol, yeast extract, tryptone and ammonium sulfate were kept at 8%, 37 °C, 10 g/L, 7 g/L, 7 g/L and 3 g/L, respectively. Error bars show standard deviations of means ( $n = 3$ ).

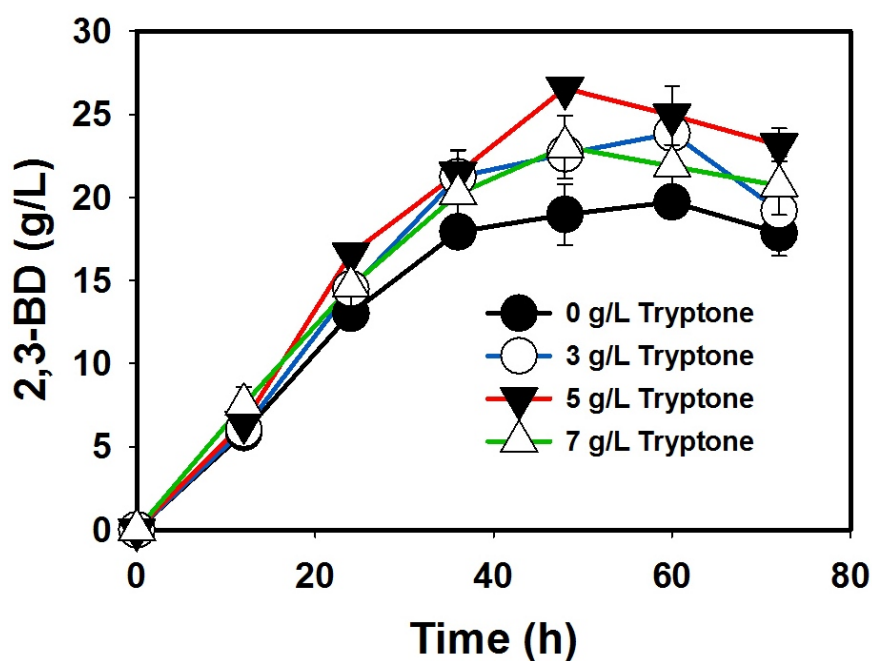

**Figure S4.** One-factor at a time experiments showing effects of tryptone on 2,3-BD production by *P. polymyxa*.

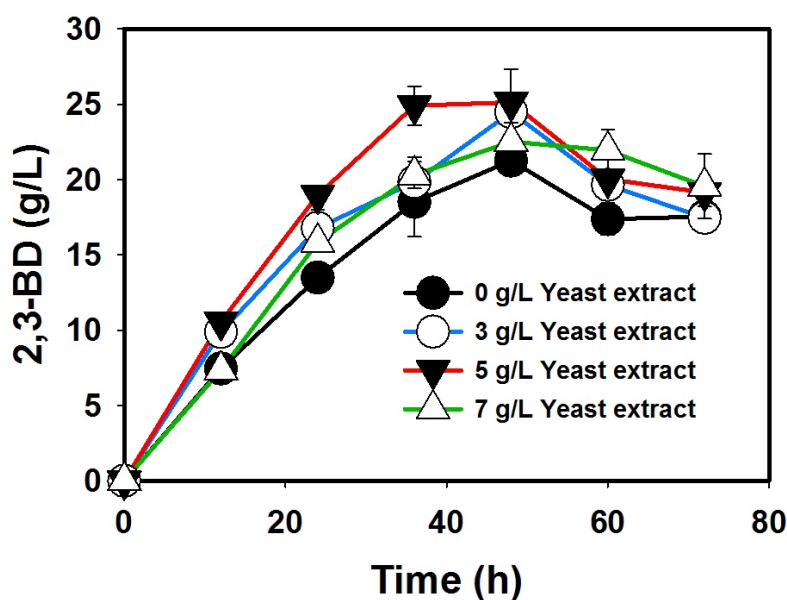

**Figure S5.** One-factor at a time experiments showing effects of yeast extract on 2,3-BD production by *P. polymyxa*. Inoculum size, temperature, glycerol, tryptone, ammonium sulfate and ammonium acetate were kept at 8%, 37 °C, 10 g/L, 7g/L, 3 g/L and 5 g/L, respectively. Error bars show standard deviations of means ( $n = 3$ ).

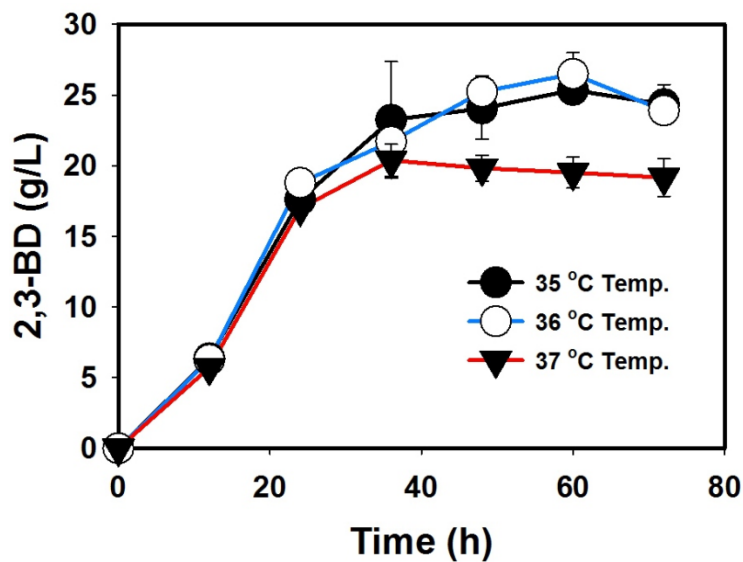

**Figure S6.** One-factor at a time experiments showing effects of temperature on 2,3-BD production by *P. polymyxa*. Inoculum size, glycerol, yeast extract, tryptone, ammonium sulfate and ammonium acetate were kept at 8%, 10 g/L, 7g/L, 7 g/L, 3g/L and 5 g/L, respectively. Error bars show standard deviations of means ( $n = 3$ ).

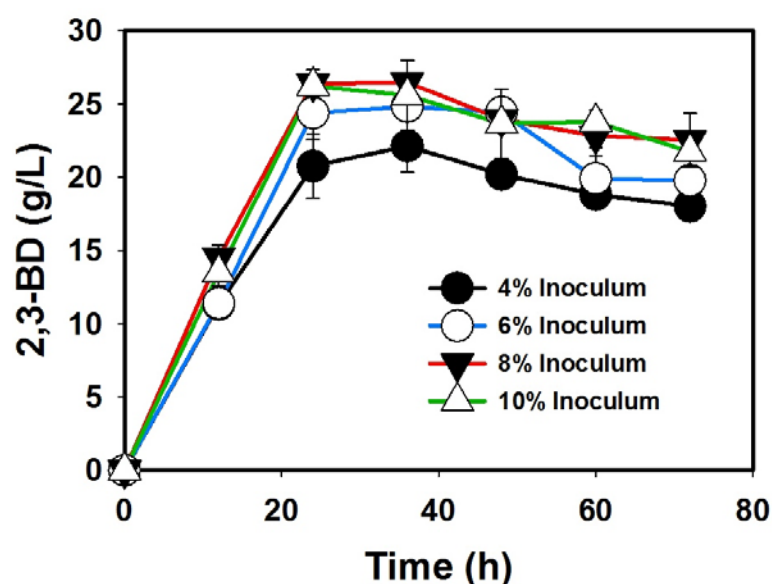

**Figure S7.** One-factor at a time experiments showing effects of inoculum size on 2,3-BD production by *P. polymyxa*. Temperature, glycerol, yeast extract, tryptone, ammonium sulfate and ammonium acetate were kept at 37 °C, 10 g/L, 7g/L, 7 g/L, 3g/L and 5 g/L, respectively. Error bars show standard deviations of means ( $n = 3$ ).

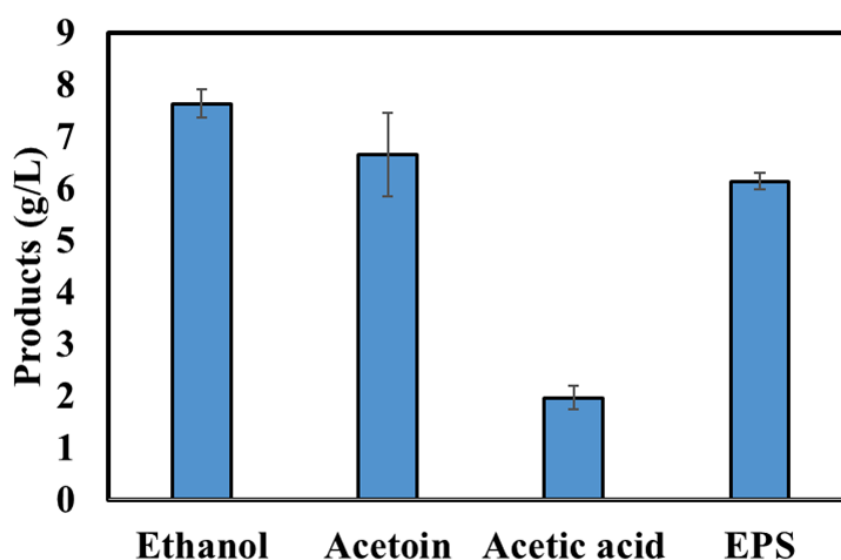

**Figure S8.** Competing products generated during 2,3-BD fermentation with the non-optimized medium and conditions.
